# Supplementary material for: Залечивание трещины в проводнике с током во внешнем магнитном поле
Source: Royal Society of Chemistry journal article supplement (doi:10.1039/d1bm01521d), 2010-01-01
Supplement: d1bm01521d1.pdf [file d1bm01521d1.pdf]

## Support Information

### ***In situ* mineralized PLGA/zwitterionic hydrogel composites scaffolds enable high-efficiency rhBMP-2 release for critical- sized bone healing**

Peiming Liu<sup>a, d §</sup>, Tianyi Bao<sup>c, §</sup>, Lian Sun<sup>c, §</sup>, Zeyi Wang<sup>a</sup>, Jin Sun<sup>a</sup>, Wan Peng<sup>a</sup>, Donglin Gan<sup>a</sup>,  
Guoyong Yin<sup>c</sup>, Pingsheng Liu<sup>a, \*</sup>, Wei-Bing Zhang<sup>b, c \*</sup>, Jian Shen<sup>a, e, \*</sup>

<sup>a</sup> Jiangsu Collaborative Innovation Center of Biomedical Functional Materials, Jiangsu Key Laboratory of Bio-functional Materials, School of Chemistry and Materials Science, Nanjing Normal University, Nanjing 210023, P. R. China

<sup>b</sup> Department of Stomatology, Dushu Lake Hospital Affiliated to Soochow University, Medical Center of Soochow University

<sup>c</sup> Department of Orthopedics, Jiangsu Key Laboratory of Oral Diseases, Nanjing Medical University, Nanjing 210029, P. R. China

<sup>d</sup> Changzhou Institute of Materia Medica Co., Ltd., Changzhou, Jiangsu 213000, China

<sup>e</sup> Jiangsu Engineering Research Center of Interfacial Chemistry, Nanjing University, Nanjing 210093, P. R. China

<sup>§</sup>These authors contributed equally to this work.

\*Corresponding authors. Email: liups@nju.edu.cn (P. L.); [wbzhang@suda.edu.cn](mailto:wbzhang@suda.edu.cn) (W. Z.)  
[shenjian@nju.edu.cn](mailto:shenjian@nju.edu.cn) (J. S.)

## 1. Preparation of m-PLGA/PSBMA scaffolds.

### *1.1. Optimization of the weight ratio of PSBMA hydrogel in mineralized PLGA/PSBMA scaffolds.*

The preparation method of PLGA/PSBMA scaffolds with various weight ratio of PSBMA hydrogel was published in our previous study [1]. In this experiment, the weight ratio of PSBMA hydrogel was set as 10 wt%, 20 wt%, 50 wt% and 60 wt%. All PLGA/PSBMA scaffolds were immersed in sterile ultrapure water (pH ~ 8) for 48 h to remove the remnants and stored at -20 °C after freeze drying. Subsequently, the mineralized solution containing with 30 wt% of calcium chloride was prepared and 200  $\mu$ L of mineralized solution was dropped on the surface of PLGA/PSBMA scaffolds with various weight ratio of PSBMA hydrogel for 30 min. Then the Ca/P-rich PLGA/PSBMA scaffolds were immersed in ammonium hydroxide (15%, v/v) for 3 h to precipitate calcium phosphate [2]. The mineralized PLGA/PSBMA scaffolds were immersed in sterile ultrapure water (pH ~ 8) for 48 h to remove the remnants and stored at -20 °C after freeze drying. Morphology of surface and cross-section of m-PLGA/PSBMA scaffolds were collected *via* camera.

### *1.2. Optimization of the volume of mineralized solution.*

The PLGA/PSBMA scaffolds with 50 wt% of PSBMA hydrogel and the mineralized solution with  $\text{Ca}^{2+}$  (3.37 mol/L) were prepared. Then 50  $\mu$ L, 100  $\mu$ L or 200  $\mu$ L of mineralized solution was dropped on the surface of PLGA/PSBMA scaffolds for 30 min. Then the Ca/P-rich PLGA/PSBMA scaffolds were immersed in ammonium hydroxide (15%, v/v) for 3 h to precipitate calcium phosphate. The purification method was referred to the above protocol. The SEM images of surface and cross-section of m-PLGA/PSBMA were measured via SEM.

### *1.3. Optimization of the concentration of mineralized solution.*

The PLGA/PSBMA scaffolds with 50 wt% of PSBMA hydrogel were prepared according aforementioned protocol. The molar concentration of  $\text{Ca}^{2+}$  in mineralized solution was set at 1.69, 3.37 and 4.21 mol/L, and 200  $\mu$ L of mineralized solution was dropped on the surface of PLGA/PSBMA scaffolds for 30 min. Then the Ca/P-rich PLGA/PSBMA scaffolds were immersed in ammonium hydroxide (15%, v/v) for 3 h to precipitate calcium phosphate. The purification method was referred to the above protocol. Morphology of surface and cross-section of mineralized PLGA/PSBMA scaffolds were collected *via* camera..

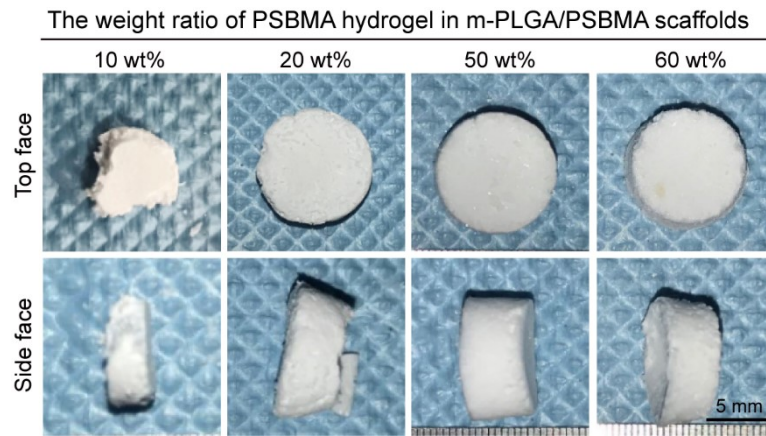

Fig. S1. Morphology of mineralized PLGA/PSBMA scaffolds containing with various weight ratio of PSBMA hydrogel. The mineralized PLGA/PSBMA scaffolds were mineralized in 200  $\mu\text{L}$  of mineralized solution with  $\text{Ca}^{2+}$  (3.37 mol/L).

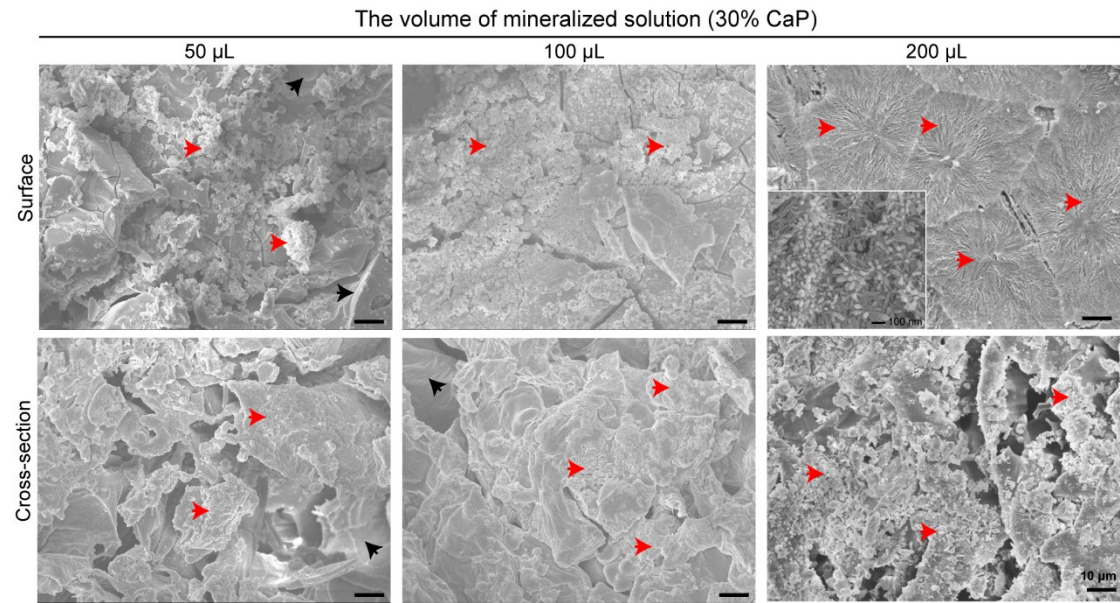

Fig. S2. SEM images of the surface and cross-section of mineralized PLGA/PSBMA. The weight ratio of PSBMA hydrogel was 50 wt%. The molar concentration of  $\text{Ca}^{2+}$  was served as 3.37 mol/L, and the volume of mineralized solution was set at 50  $\mu\text{L}$ , 100  $\mu\text{L}$  or 200  $\mu\text{L}$ , respectively.

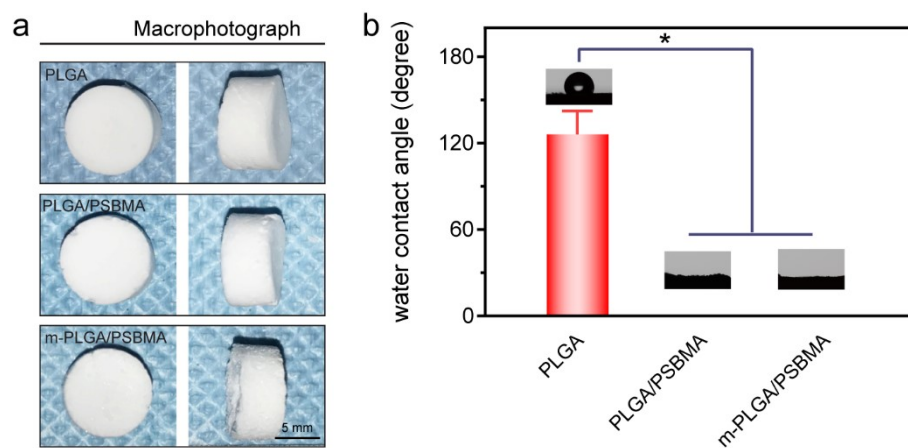

Fig. S3. (a) The representative images of PLGA, PLGA/PSBMA and m-PLGA/PSBMA scaffolds. (b) Images and quantitative analysis of water contact angle of PLGA, PLGA/PSBMA and m-PLGA/PSBMA scaffolds. All data were presented as the mean  $\pm$  standard error (SEM) and all differences are significant ( $*P < 0.05$ , two-way ANOVA) unless denoted as NS (not significant).

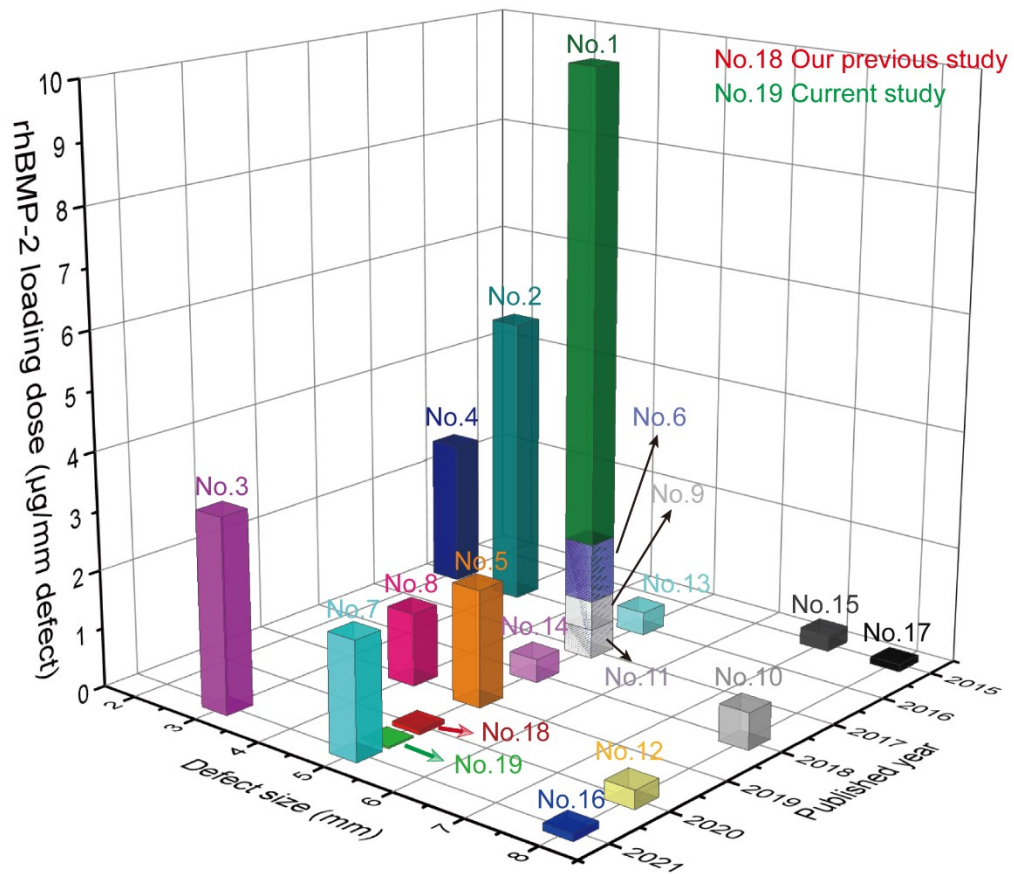

Fig. S4. Summary of rhBMP-2 loading doses on various biodegradable scaffolds for effective healing of critical-sized bone defects in recent five years. The co-delivery of rhBMP-2 with other growth factors, peptides or cells is not included.

Table. S1 Summary of rhBMP-2 loading doses on various biodegradable scaffolds for effective healing of critical-sized bone defects in recent five years. The co-delivery of rhBMP-2 with other growth factors, peptides or cells is not included.

| No. in Fig. 8 | Defected size (mm) | Year | rhBMP-2 loading dose ( $\mu\text{g}/\text{mm}$ defect) | Ref. |
|---------------|--------------------|------|--------------------------------------------------------|------|
| 1             | 5                  | 2017 | 10                                                     | [3]  |
| 2             | 3                  | 2016 | 5                                                      | [4]  |
| 3             | 3                  | 2021 | 3.33                                                   | [5]  |
| 4             | 2                  | 2016 | 2.5                                                    | [6]  |
| 5             | 5                  | 2019 | 2                                                      | [7]  |
| 6             | 5                  | 2017 | 2                                                      | [8]  |
| 7             | 5                  | 2021 | 2                                                      | [9]  |
| 8             | 4                  | 2019 | 1.25                                                   | [10] |
| 9             | 5                  | 2017 | 1                                                      | [11] |
| 10            | 8                  | 2018 | 0.625                                                  | [12] |
| 11            | 5                  | 2017 | 0.5                                                    | [13] |
| 12            | 8                  | 2020 | 0.31                                                   | [14] |
| 13            | 5                  | 2016 | 0.4                                                    | [15] |
| 14            | 5                  | 2018 | 0.4                                                    | [16] |
| 15            | 7                  | 2015 | 0.286                                                  | [17] |
| 16            | 8                  | 2021 | 0.125                                                  | [18] |
| 17            | 8                  | 2015 | 0.125                                                  | [19] |
| 18            | 5                  | 2020 | 0.08                                                   | [1]  |
| 19            | 5                  | 2020 | 0.03                                                   | *    |

\* The current study.

## References

- [1] P. Liu, L. Sun, Z. Wang, J. Sun, Y. Dong, L. Cao, J. Shen, W.B. Zhang, P. Liu, Biodegradable zwitterion/PLGA scaffold enables robust healing of rat calvarial defects with ultra-low dose of rhBMP-2, *Biomacromolecules* 21(7) (2020) 2844-2855.
- [2] S.H. Jeong, Y.H. Koh, S.W. Kim, J.U. Park, H.E. Kim, J. Song, Strong and Biostable Hyaluronic Acid-Calcium Phosphate Nanocomposite Hydrogel via in Situ Precipitation Process, *Biomacromolecules* 17(3) (2016) 841-51.
- [3] X. Qi, Y. Liu, Z.Y. Ding, J.Q. Cao, J.H. Huang, J.Y. Zhang, W.T. Jia, J. Wang, C.S. Liu, X.L. Li, Synergistic effects of dimethyloxallyl glycine and recombinant human bone morphogenetic protein-2 on repair of critical-sized bone defects in rats, *Sci Rep* 7 (2017) 42820.
- [4] S. Zwingenberger, R. Langanke, C. Vater, G. Lee, E. Niederlohmman, M. Sensenschmidt, A. Jacobi, R. Bernhardt, M. Muders, S. Rammelt, S. Knaack, M. Gelinsky, K.P. Gunther, S.B. Goodman, M. Stiehler, The effect of SDF-1 on low dose BMP-2 mediated bone regeneration by release from heparinized mineralized collagen type I matrix scaffolds in a murine critical size bone defect model, *J Biomed Mater Res A* 104(9) (2016) 2126-2134.
- [5] Z. Bal, F. Korkusuz, H. Ishiguro, R. Okada, J. Kushioka, R. Chijimatsu, J. Kodama, D. Tateiwa, Y. Ukon, S. Nakagawa, E.C. Dede, M. Gizer, P. Korkusuz, H. Yoshikawa, T. Kaito, A novel nano-hydroxyapatite/synthetic polymer/bone morphogenetic protein-2 composite for efficient bone regeneration, *Spine J* 21(5) (2021) 865-873.
- [6] S. Bougioukli, A. Jain, O. Sugiyama, B.A. Tinsley, A.H. Tang, M.H. Tan, D.J. Adams, P.J. Kostenuik, J.R. Lieberman, Combination therapy with BMP-2 and a systemic RANKL inhibitor enhances bone healing in a mouse critical-sized femoral defect, *Bone* 84 (2016) 93-103.
- [7] S.H. Han, S.H. Jung, J.H. Lee, Preparation of beta-tricalcium phosphate microsphere-hyaluronic acid-based powder gel composite as a carrier for rhBMP-2 injection and evaluation using long bone segmental defect model, *Journal of Biomaterials Science, Polymer Edition* 30(8) (2019) 679-693.
- [8] Y.H. Ji, M.B. Wang, W.Q. Liu, C.S. Chen, W. Cui, T.F. Sun, Q.L. Feng, X.D. Guo, Chitosan/nHAC/PLGA microsphere vehicle for sustained release of rhBMP-2 and its derived synthetic oligopeptide for bone regeneration, *J Biomed Mater Res A* 105(6) (2017) 1593-1606.
- [9] M. Fenelon, M. Etchebarne, R. Siadous, A. Gremare, M. Durand, L. Sentilhes, S. Catros, F. Gindraux, N. L'Heureux, J.C. Fricain, Comparison of amniotic membrane versus the induced membrane for bone regeneration in long bone segmental defects using calcium phosphate cement loaded with BMP-2, *Mater Sci Eng C Mater Biol Appl* 124 (2021) 112032.
- [10] K. Stuckensen, J.M. Lamo-Espinosa, E. Muiños-López, P. Ripalda-Cemboráin, T. López-Martínez, E. Iglesias, G. Abizanda, I. Andreu, M. Flandes-Iparraguirre, J. Pons-Villanueva, Anisotropic cryostructured collagen scaffolds for efficient delivery of RhBMP-2 and enhanced bone regeneration, *Materials* 12(19) (2019) 3105.
- [11] B.-B. Seo, J.-T. Koh, S.-C. Song, Tuning physical properties and BMP-2 release rates of injectable hydrogel systems for an optimal bone regeneration effect, *Biomaterials* 122 (2017) 91-104.
- [12] E.B. Bae, K.H. Park, J.H. Shim, H.Y. Chung, J.W. Choi, J.J. Lee, C.H. Kim, H.J. Jeon, S.S. Kang, J.B. Huh, Efficacy of rhBMP-2 Loaded PCL/beta-TCP/bdECM Scaffold Fabricated by 3D Printing Technology on Bone Regeneration, *Biomed Res Int* (2018).
- [13] T. Nakamura, Y. Shirakata, Y. Shinohara, R.J. Miron, K. Hasegawa-Nakamura, M. Fujioka-Kobayashi, K. Noguchi, Comparison of the effects of recombinant human bone morphogenetic protein-

- 2 and-9 on bone formation in rat calvarial critical-size defects, *Clin Oral Invest* 21(9) (2017) 2671-2679.
- [14] S.H. Han, J. Lee, K.M. Lee, Y.Z. Jin, H.-s. Yun, G. Kim, J.H. Lee, Enhanced healing of rat calvarial defects with 3D printed calcium-deficient hydroxyapatite/collagen/bone morphogenetic protein 2 scaffolds, *Journal of the mechanical behavior of biomedical materials* 108 (2020) 103782.
- [15] X.F. Shen, Y.X. Zhang, Y. Gu, Y. Xu, Y. Liu, B. Li, L. Chen, Sequential and sustained release of SDF-1 and BMP-2 from silk fibroin-nanohydroxyapatite scaffold for the enhancement of bone regeneration, *Biomaterials* 106 (2016) 205-216.
- [16] D. Mumcuoglu, S. Fahmy-Garcia, Y. Ridwan, J. Nickel, E. Farrell, S.G.J.M. Kluijtmans, G.J.V.M. van Osch, Injectable Bmp-2 Delivery System Based on Collagen-Derived Microspheres and Alginate Induced Bone Formation in a Time- and Dose-Dependent Manner, *Eur Cells Mater* 35 (2018) 242-254.
- [17] E. Quinlan, E.M. Thompson, A. Matsiko, F.J. O'Brien, A. Loez-Noriega, Long-term controlled delivery of rhBMP-2 from collagen-hydroxyapatite scaffolds for superior bone tissue regeneration, *J Control Release* 207 (2015) 112-119.
- [18] Q. Fan, J. Bai, H. Shan, Z. Fei, H. Chen, J. Xu, Q. Ma, X. Zhou, C. Wang, Implantable blood clot loaded with BMP-2 for regulation of osteoimmunology and enhancement of bone repair, *Bioact Mater* 6(11) (2021) 4014-4026.
- [19] I.G. Kim, M.P. Hwang, P. Du, J. Ko, C.W. Ha, S.H. Do, K. Park, Bioactive cell-derived matrices combined with polymer mesh scaffold for osteogenesis and bone healing, *Biomaterials* 50 (2015) 75-86.
